# Supplementary material for: NDRG1 is induced by antigen-receptor signaling but dispensable for B and T cell self-tolerance
Source: PubMed Central journal article supplement (PMC9649591; doi:10.1038/s42003-022-04118-w), 2022-11-10
Supplement: 42003_2022_4118_MOESM2_ESM.pdf [file 42003_2022_4118_MOESM2_ESM.pdf]

## Description of Additional Supplementary Files

**File name:** Supplementary Data

**Description:** Top differentially expressed genes between anergic and naïve follicular B cells. Genes differentially expressed over 1 log<sub>2</sub>FoldChange and below a significance threshold of adjusted p value 0.05 between anergic and naïve follicular B cells as determined by DESeq2. Genes are sorted here by log<sub>2</sub>FoldChange.
